# Supplementary material
Source: Research Square preprint supplement (doi:10.21203/rs.3.rs-9772119/v1)
Supplement: Supplementary file 1 [file dd1a3208a1d24a08288f9c06.docx]

Supplementary Table S1.Variance Inflation Factor values of clinical features.

| Variable | VIF |
| --- | --- |
| Plaque SWE_NS(m/s) | 1.032 |
| Plaque thickness (mm) | 1.066 |
| IPN | 1.03 |
| TG (mmol/L) | 1.058 |
| Smoking | 1.098 |

Abbreviations: VIF, variance inflation factor; SWE, shear wave elastography; NS, near-shoulder; IPN, intraplaque neovascularization; TG, triglycerides.

Supplementary Table S2. Hyperparameter configurations and tuning grids for machine learning models.

| **ML model** | **Detailed parameter settings** |
| --- | --- |
| **LR** | family: binomial, method: generalized linear model (standard logistic regression) |
| **RF** | mtry: {1, 2}, ntree: 100, nodesize: 15, maxnodes: 12 |
| **SVM** | method: svmRadial, sigma: {0.001, 0.005}, C: {0.01, 0.1} |
| **DT** | method: rpart, complexity parameter (cp): {0.1, 0.15, 0.2} |
| **KNN** | k: {51, 71, 91}, distance metric: Euclidean (default) |

Abbreviations: LR, logistic regression; RF, random forest; SVM, support vector machine; DT, decision tree; KNN, k-nearest neighbor.
